# Supplementary material for: In Vitro Studies of Endophytic Bacteria Isolated from Ginger (Zingiber officinale) as Potential Plant-Growth-Promoting and Biocontrol Agents against Botrytis cinerea and Colletotrichum acutatum
Source: MDPI journal article supplement (doi:10.3390/plants12234032), 2023-11-30
Supplement: s1 [file s1]

## SUPPLEMENTARY MATERIAL

**Table S1.** Percentage inhibition of growth in phytopathogenic fungi *B. cinerea* and *C. acutatum* subsequent to co-cultivation with ginger endophytic bacteria in LB medium after 7 days of incubation at 25°C.

| Isolates | Identification                   | Inhibition of<br><i>B. cinerea</i> B05.10<br>(%) | Inhibition of<br><i>C. acutatum</i><br>IMI34849<br>(%) |
|----------|----------------------------------|--------------------------------------------------|--------------------------------------------------------|
| J2       | <i>Lelliottia amnigena</i>       | 96.73 ± 0.09                                     | 91.85 ± 0.45                                           |
| J11      |                                  | 97.14 ± 0.44                                     | 90.13 ± 1.59                                           |
| J12      |                                  | 97.40 ± 0.07                                     | 87.59 ± 0.31                                           |
| J21      |                                  | 96.33 ± 1.38                                     | 73.81 ± 0.91                                           |
| J29      |                                  | 97.17 ± 0.21                                     | 95.31 ± 0.49                                           |
| J23      | <i>Lysinibacillus capsici</i>    | 96.80 ± 0.17                                     | 91.10 ± 0.86                                           |
| J24      |                                  | 96.13 ± 0.32                                     | 87.37 ± 0.60                                           |
| J26      |                                  | 96.96 ± 0.55                                     | 90.50 ± 0.27                                           |
| J22      | <i>Lysinibacillus macroides</i>  | 97.25 ± 0.43                                     | 92.19 ± 0.17                                           |
| J25      |                                  | 97.11 ± 0.38                                     | 92.82 ± 0.89                                           |
| J15      | <i>Kocuria polaris</i>           | 96.58 ± 0.29                                     | 75.05 ± 0.18                                           |
| J17      |                                  | 95.98 ± 1.20                                     | 88.01 ± 1.59                                           |
| J19      |                                  | 96.46 ± 0.50                                     | 90.21 ± 1.52                                           |
| J16      | <i>Agrococcus citreus</i>        | 97.08 ± 0.73                                     | 87.67 ± 0.97                                           |
| J28      |                                  | 97.26 ± 0.56                                     | 91.28 ± 0.75                                           |
| J14      | <i>Agrobacterium tumefaciens</i> | 96.86 ± 0.84                                     | 91.52 ± 1.04                                           |
| J20      | <i>Zymobacter palmae</i>         | 95.22 ± 0.80                                     | 83.17 ± 0.60                                           |
| J30      | <i>Acinetobacter schindleri</i>  | 94.13 ± 1.66                                     | 91.85 ± 0.45                                           |
| J5       | <i>Mycolicibacterium</i> sp.     | 96.60 ± 0.75                                     | 90.13 ± 1.59                                           |

Values are expressed as mean ± standard deviation of triplicate readings.

**Table S2.** Quantification of indole acetic acid (IAA,  $\mu\text{g/mL}$ ) synthesized by the isolates after culturing each bacterial strain on King-B medium in the presence and absence of the amino acid tryptophan (Trp). Incubation occurred for 48 hours at 25°C with continuous shaking.

| Isolate | Identification                   | [IAA]<br>with Trp | [IAA]<br>without Trp |
|---------|----------------------------------|-------------------|----------------------|
| J2      | <i>Lelliottia amnigena</i>       | $4.02 \pm 0.09$   | $2.51 \pm 0.06$      |
| J11     |                                  | $1.39 \pm 0.14$   | $0.17 \pm 0.06$      |
| J12     |                                  | $3.09 \pm 0.12$   | $0.17 \pm 0.06$      |
| J21     |                                  | $2.33 \pm 0.18$   | $0.81 \pm 0.06$      |
| J29     |                                  | $4.60 \pm 0.20$   | $0.00 \pm 0.00$      |
| J23     | <i>Lysinibacillus capsici</i>    | $4.56 \pm 0.22$   | $3.13 \pm 0.14$      |
| J24     |                                  | $3.98 \pm 0.35$   | $1.24 \pm 0.16$      |
| J26     |                                  | $2.22 \pm 0.13$   | $2.93 \pm 0.29$      |
| J22     | <i>Lysinibacillus macroides</i>  | $0.77 \pm 0.06$   | $0.13 \pm 0.02$      |
| J25     |                                  | $3.42 \pm 0.08$   | $2.51 \pm 0.04$      |
| J15     | <i>Kocuria polaris</i>           | $2.31 \pm 0.17$   | $0.00 \pm 0.00$      |
| J17     |                                  | $2.90 \pm 0.14$   | $1.47 \pm 0.09$      |
| J19     |                                  | $1.49 \pm 0.14$   | $0.61 \pm 0.09$      |
| J16     | <i>Agrococcus citreus</i>        | $4.54 \pm 0.31$   | $4.54 \pm 0.31$      |
| J28     |                                  | $0.81 \pm 0.09$   | $0.81 \pm 0.09$      |
| J14     | <i>Agrobacterium tumefaciens</i> | $2.09 \pm 0.08$   | $2.09 \pm 0.08$      |
| J20     | <i>Zymobacter palmae</i>         | $1.26 \pm 0.10$   | $1.26 \pm 0.10$      |
| J30     | <i>Acinetobacter schindleri</i>  | $0.07 \pm 0.01$   | $0.00 \pm 0.00$      |
| J5      | <i>Mycolicibacterium</i> sp.     | $1.04 \pm 0.06$   | $1.04 \pm 0.06$      |

Values are expressed as mean  $\pm$  standard deviation of triplicate readings.
